# Supplementary material
Source: HighWire-hosted journal article supplement (http://erj.ersjournals.com/highwire/filestream/114119/field_highwire_adjunct_files/0/Supplemental_Material_ERJ01222-2013.pdf)
Supplement: Supplemental_Material_ERJ01222-2013.pdf [file Supplemental_Material_ERJ01222-2013.pdf]

**Acute Exacerbation of Idiopathic Pulmonary Fibrosis Associated with Air Pollution  
Exposure – Supplementary Material**

**Supplementary Table 1: Sensitivity Analyses over Three Exposure Periods**

| <b>Exposure Period (days preceding diagnosis)</b> | <b>Mean O<sub>3</sub> (n=55)<br/>HR (95%CI)</b> | <b>Mean NO<sub>2</sub> (n=87)<br/>HR (95%CI)</b> |
|---------------------------------------------------|-------------------------------------------------|--------------------------------------------------|
| 1-14                                              | 0.82 (0.39-1.73)                                | 0.83 (0.50-1.37)                                 |
| 15-28                                             | 2.79 (1.67-4.67)                                | 0.96 (0.47-1.97)                                 |
| 29-56                                             | 0.78 (0.45-1.36)                                | 1.73 (0.98-3.06)                                 |

Abbreviations: O<sub>3</sub>=ozone, NO<sub>2</sub>=nitrogen dioxide, HR=hazard ratio. HRs adjusted for forced vital capacity, smoking status and the effect of other exposure periods in this analysis.

**Supplementary Table 2: Sensitivity Analyses for Exceedances with Alternative Standards**

| <b>Pollutant</b>              | <b>US EPA</b>    | <b>Air Korea</b> | <b>WHO</b>       |
|-------------------------------|------------------|------------------|------------------|
| O <sub>3</sub> , HR (95%CI)   | 1.51 (1.17-1.94) | 1.35 (1.04-1.77) | 1.24 (0.99-1.54) |
| NO <sub>2</sub> , HR (95%CI)  | 1.21 (1.12-1.31) | 1.21 (1.12-1.31) | --               |
| PM <sub>10</sub> , HR (95%CI) | 1.06 (0.83-1.36) | 1.15 (0.91-1.45) | 1.16 (0.83-1.63) |
| SO <sub>2</sub> , HR (95%CI)  | --               | --               | n/a              |
| CO, HR (95%CI)                | --               | --               | n/a              |

Abbreviations: O<sub>3</sub>=ozone, NO<sub>2</sub>=nitrogen dioxide, PM<sub>10</sub>=particulate matter less than 10 microns in aerodynamic diameter, SO<sub>2</sub>=sulfur dioxide, CO=carbon monoxide, HR=hazard ratio, US EPA=United States environmental protection agency, WHO=World health organization, n/a=not applicable. HRs adjusted for forced vital capacity and smoking status. There were no exceedances above specified standards where no values listed. 'N/a' where published standards could not be applied.

**Supplementary Figure 1: Distance from Residential Address to Monitoring Site**

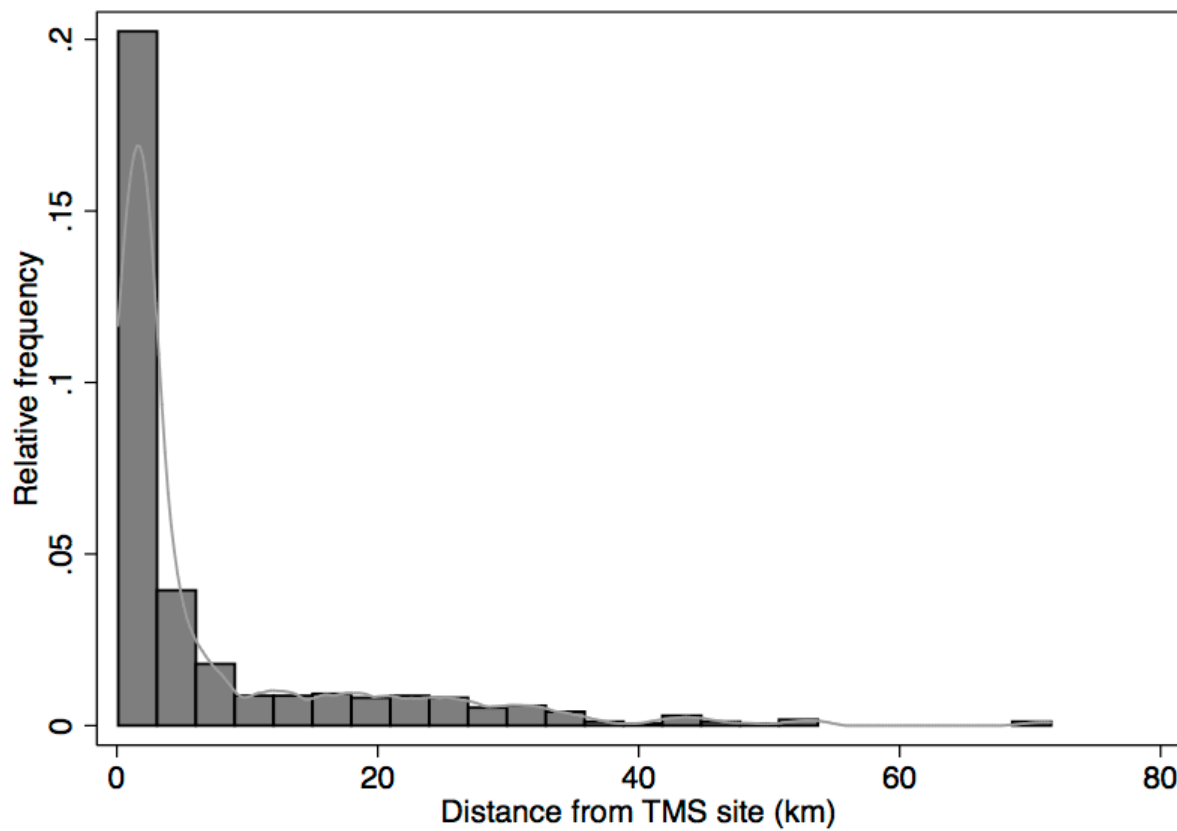

Figure Legend: Histogram showing distance (kilometers) from each patient's residential address to their assigned air pollution monitoring site
